# Supplementary material for: Orthogonal supramolecular protein assembly on patterned bifunctional surfaces
Source: Royal Society of Chemistry journal article supplement (doi:10.1039/c7cc09808a), 2018-01-01
Supplement: c7cc09808a1.pdf [file c7cc09808a1.pdf]

**Supporting Information to**

**Orthogonal supramolecular protein assembly on patterned bifunctional surfaces**

**D. Wasserberg, J. Cabanas-Danés, V. Subramaniam, J. Huskens and P. Jonkheijm**

**Table of Contents**

|                                         |     |
|-----------------------------------------|-----|
| 1. Materials                            | S2  |
| 2. Synthesis                            | S2  |
| 3. Methods                              | S6  |
| 4. Supporting Charts, Figures and Table | S11 |
| 5. Supporting References                | S15 |

## 1. Materials

Fmoc-L-glutamic acid  $\alpha$ -*t*Bu-ester, Fmoc-protected amino acids and *N,N,N',N'*-tetramethyl-O-(1H-benzotriazol-1-yl)uronium hexafluorophosphate (HBTU) and 1-hydroxy benzotriazole (HOBT) were purchased from MultiSynTech (Witten, Germany) and Novabiochem (Darmstadt, Germany), and maleimide caproic acid-hexa(histidine) (-H<sub>6</sub>) were purchased from JPT Peptide Technologies, Germany and all solvents were of p.a. quality and purchased from Biosolve (Valkenswaard, The Netherlands). Diadamantyl-modified fluorescein (ad<sub>2</sub>Fl) was synthesized according to a previously published procedure.<sup>51</sup> All other starting components and materials were purchased from Acros (Geel, Belgium) and Sigma Aldrich (Zwijndrecht, The Netherlands). All compounds were used as received unless stated otherwise. Deuterated solvents used for NMR spectroscopy were purchased from Cambridge Isotope Laboratories and the water used was of MilliQ quality (Millipore, R = 18.2 M $\Omega$ \*cm).

## 2. Synthesis

### NTA(O*t*Bu)<sub>3</sub>-NH<sub>2</sub>

NTA(O*t*Bu)<sub>3</sub>-NH<sub>2</sub> was synthesized according to a protocol adapted from literature.<sup>52</sup> H-Lys(Z)-O*t*Bu-HCl (4.0 g, 10.7 mmol) was dissolved in 100 mL of dry dimethylformamide (DMF). Subsequently, *t*Bu-bromoacetate (6.36 mL, 43.1 mmol) and diisopropyl ethyl amine (DIPEA) (9.2 mL, 52.8 mmol) were added sequentially. After purging the flask with N<sub>2</sub>, the solution was stirred overnight at 55°C under inert N<sub>2</sub> atmosphere. The volatiles were removed *in vacuo* at 60°C and the partially solidified reaction mixture was resuspended in 60 mL of cyclohexane:ethylacetate (3:1) and filtered using a sintered glass funnel. The precipitate was washed with the same solvent mixture (3 x 40 mL), the combined filtrate, then, concentrated under reduced pressure and purified by column chromatography (SiO<sub>2</sub>, cyclohexane:ethylacetate, 3:1) to quantitatively yield 5.95 g (10.5 mmol) Lys(Z)-NTA(O*t*Bu)<sub>3</sub> (R<sub>f</sub> = 0.50). Then, Lys(Z)-NTA(O*t*Bu)<sub>3</sub> (6.0 g, 10.5 mmol) was dissolved in methanol (300 mL) and the solution was purged with three vacuum-nitrogen cycles. Subsequently, 10% Pd/C (0.120 g) was added under N<sub>2</sub>. The solution was mixed vigorously and stirred for 6 h under H<sub>2</sub> atmosphere at room temperature. After the H<sub>2</sub> gas had been allowed to slowly leak from the reaction mixture while being replaced by nitrogen, the Pd/C catalyst was removed by filtration over celite and the solvent was removed from the filtrate under reduce pressure to yield (O*t*Bu)<sub>3</sub>NTA-NH<sub>2</sub> (3.68 g, 8.5 mmol, 81%). <sup>1</sup>H NMR (300 MHz, CDCl<sub>3</sub>, 20°C, TMS)  $\delta$ : 3.47 (dd, 4H, ((CH<sub>3</sub>)<sub>3</sub>COCOCH<sub>2</sub>)<sub>2</sub>N-), 3.31 (t, 1H, ((CH<sub>3</sub>)<sub>3</sub>COCOCH<sub>2</sub>)<sub>2</sub>NCH), 2.72 (t, 2H, NH<sub>2</sub>CH<sub>2</sub>CH<sub>2</sub>CH<sub>2</sub>CH<sub>2</sub>CHN-), 2.28 (bs, 2H, NH<sub>2</sub>CH<sub>2</sub>CH<sub>2</sub>CH<sub>2</sub>CH<sub>2</sub>CHN-), 1.65 (m, 2H, NH<sub>2</sub>CH<sub>2</sub>CH<sub>2</sub>CH<sub>2</sub>CH<sub>2</sub>CHN-), 1.50 (m, 4H, NH<sub>2</sub>CH<sub>2</sub>CH<sub>2</sub>CH<sub>2</sub>CH<sub>2</sub>CHN-), 1.45 (s, 9H, (CH<sub>3</sub>)<sub>3</sub>COCOCH-), 1.44 (s, 18H, ((CH<sub>3</sub>)<sub>3</sub>COCOCH<sub>2</sub>)<sub>2</sub>N-); MS (ESI): m/z = 432.3 [M+H]<sup>+</sup>, (calc. 431.0).

## adHEG

Adamantyl hexa(ethylene glycol), adHEG, was synthesized according to a protocol adapted from literature.<sup>5</sup> To a solution of hexa(ethylene glycol) (12.5 mL, 50.9 mmol), 1-bromo adamantane (1.1 g, 5.1 mmol) and Et<sub>3</sub>N (2.0 mL, 14.3 mmol) were added. The solution was stirred at 120°C overnight. After cooling the reaction mixture to room temperature dichloromethane (50 mL) was added. The solution was washed with 2 M HCl (4 x 50 mL) and once with brine (50 mL). The organic layer was dried over MgSO<sub>4</sub> and the solvent was evaporated under reduced pressure to give adHEG as a brown, transparent oil (0.87 g, 2.1 mmol, 40%). MS (ESI): m/z = 417.4 [M+H]<sup>+</sup>, (calc. 416.6 g/mol).

## 6-aminohexyl-1-adamantane carboxamide

1,6-Hexanediamine (5.81 g, 50.0 mmol) was dissolved in 180 mL CH<sub>2</sub>Cl<sub>2</sub> and, subsequently, Et<sub>3</sub>N (0.77 mL, 5.55 mmol) was added. The reaction mixture was cooled to 0°C and a solution of adamantane carboxylic acid chloride (1.0 g, 5.04 mmol) in 20 mL CH<sub>2</sub>Cl<sub>2</sub> was added dropwise during the course of 1 h. The reaction mixture was stirred for 30 min at 0°C, left to slowly warm to room temperature (RT) and quenched with 150 mL of a saturated aqueous NaHCO<sub>3</sub> solution. The resulting aqueous phase was, then, washed 3 times with (50 mL) CH<sub>2</sub>Cl<sub>2</sub> and the combined organic phases were washed three times with water and once with brine. The solution was dried over MgSO<sub>4</sub>, concentrated *in vacuo* and the product, 6-aminohexyl-1-adamantane carboxamide (0.9 g, 3.22 mmol, 64%), was analyzed with NMR spectroscopy. <sup>1</sup>H-NMR (300 MHz, CDCl<sub>3</sub>): δ (ppm) 3.1 (t, 2H), 2.7 (t, 2H), 2.0-1.7 (m, 15H), 1.4-1.2 (m, 8H).

## Fmoc-glutamic acid adamantane hexane amide-carboxylic acid α-tBu-ester

To a solution of Fmoc-L-glutamic acid α-tBu-ester (1.56 g, 3.66 mmol) in 30 mL DMF, N,N'-diisopropylcarbodiimide (DIC) (1.54 g, 12.2 mmol) and HOBt (1.65 g, 12.2 mmol) were added under Ar atmosphere. The reaction mixture was stirred for 30 min at RT for the activation of the carboxylic acid to take place. 6-aminohexyl-1-adamantane carboxamide (0.85 g, 3.05 mmol) was dissolved in 10 mL DMF and added to the reaction mixture, which was stirred at RT for 2 h. The progress of the reaction was followed by NMR (measured by the intensity of the free amine peak) and stopped after approximately 2 h, at which time all the free amine had been consumed. The solvent was removed *in vacuo* and the resulting residue was dissolved in 150 mL ethylacetate:hexane 1:1 and washed 3 times with sat. NH<sub>4</sub>Cl (30 mL) in order to remove DMF, any residual traces of DMF were, then, removed *in vacuo*. The crude product was, subsequently, dissolved in methylene chloride and washed 3 times with sat. NaHCO<sub>3</sub> (50 mL), twice with water (50 mL) and once with brine. The organic phase was dried over MgSO<sub>4</sub> and concentrated *in vacuo*. The crude product was purified by column

chromatography (SiO<sub>2</sub>, chloroform:methanol, 95:5) and resulted in 1.7 g (2.50 mmol) of pure product corresponding to 82% yield.

<sup>1</sup>H-NMR (300MHz, CDCl<sub>3</sub>): δ (ppm) 7.8-7.3 (m, 8H), 5.6 (d, 2H), 5.5 (m, 1H), 4.4 (t, 1H), 4.4 (t, 1H), 4.2 (m, 2H), 3.1 (t, 4H), 2.0-1.7 (m, 15H), 1.43 (s, 9H), 1.4-1.2 (m, 8H). MS (ESI-TOF): m/z; 686.4 g/mol [M+H]<sup>+</sup> and 708.4 g/mol [M+Na]<sup>+</sup> (calc. 685.89 g/mol).

### **Fmoc-glutamic acid adamantanehexaneamide-carboxylic acid**

1.65 g (2.40 mmol) Fmoc-glutamic acid adamantanehexaneamide-carboxylic acid α-tBu ester was dissolved in 30 mL CH<sub>2</sub>Cl<sub>2</sub>, to which 30 mL TFA were added. The solution was stirred for 4 h at RT and subsequently, the reaction mixture was concentrated *in vacuo*. The resulting solution was washed 3 times with water, once with brine and dried over MgSO<sub>4</sub>. All residual CH<sub>2</sub>Cl<sub>2</sub> was removed *in vacuo* and the obtained yellowish solid (1.3 g, 2.04 mmol, 85%) was analyzed by NMR spectroscopy and MS spectrometry and stored at -20°C until further use.

<sup>1</sup>H-NMR (300MHz, CDCl<sub>3</sub>): δ (ppm) 7.8-7.3 (m, 8H), 5.6 (d, 2H), 5.5 (m, 1H), 4.4 (t, 1H), 4.4 (t, 1H), 4.2 (m, 2H), 3.1 (t, 4H), 2.0-1.7 (m, 15H), 1.4-1.2 (m, 8H).

MS (ESI-ToF): m/z; 630.3 [M+H]<sup>+</sup> and 652.2 [M+Na]<sup>+</sup> (calc. 629.8).

### **Automated solid phase peptide synthesis**

Peptides of the following sequences, end-capped with maleimido caproic acid, were synthesized using a Syro1 (MultiSynTech) and standard Fmoc-chemistry in solid phase peptide synthesis (SPPS)<sup>53</sup>: the triply adamantane substituted -GE(ad)RE(ad)DE(ad)K and the corresponding adamantane-free reference peptide -GEREDEK. Rink Amide MBHA resin was used as solid phase and all amino acids carried Fmoc-protected α-amino groups. Each amino acid was dissolved in N-methyl-2-pyrrolidone (NMP, 0.3 M), stabilized with 0.3 M HOBt and all reactions were carried out at RT. Extensive washing steps with NMP were carried out after each reaction in order to prevent cross-contaminations between steps.

In short, syntheses were carried out from C- to N-terminus as follows:

A solution containing an Fmoc-protected amino acid was added to the reaction vessel containing the amine-terminated Rink amide resin. Coupling of the free carboxylic acid group of the Fmoc-protected amino acid to the free amine of the resin was done using HBTU and DIPEA as coupling reagents and reaction time was set to 90 min. This resulted in the Rink amide resin terminated with the newly coupled amino acid displaying its Fmoc-protected amines on the resin. In order to increase yields, all couplings with natural amino acids were done twice (double couplings); all others once (single couplings). After coupling, Fmoc cleavage was carried out using first 40%, then 20% piperidine in NMP. After Fmoc-cleavage the next amino acid was added and the cycle was repeated for each amino acid until the sequence had been completed. The resin was washed with NMP, CH<sub>2</sub>Cl<sub>2</sub> and MeOH each three

times and dried for at least 4 h *in vacuo*. Subsequently, the peptide was cleaved from the resin as well as deprotected in a mixture of trifluoroacetic acid (TFA), triisopropylsilane (TIS) and water (TFA:TIS:H<sub>2</sub>O, 95:2.5:2.5) overnight. The resin was rinsed three more times with pure TFA and the combined fractions were concentrated *in vacuo*. From this mixture the peptide was precipitated three times using cold diethyl ether and a centrifugation step (8000xg, 2 min) and the combined precipitated fractions were re-dissolved in water (mixed with acetonitrile containing ~1% TFA for the adamantane substituted peptide) and lyophilized. Peptides (re-dissolved in acetonitrile/water mixtures) were purified using reverse-phase HPLC (Waters HPLC system with photoarray detector, reverse phase C18 column (Xterra, Waters), gradients of water:acetonitrile containing 0.1% TFA), subsequently lyophilized and analyzed by mass spectrometry.

MS (ESI): -GE(ad)RE(ad)DE(ad)K m/z 1836 g/mol [M+H]<sup>+</sup> (calc. 1835 g/mol).

MS (ESI): -GEREDEK m/z 1056 g/mol [M+H]<sup>+</sup> (calc. 1054 g/mol).

### **TFP, including 1H<sub>6</sub>TFP**

For Teal Fluorescent Protein (TFP), the following primers were used for PCR amplification using pET15b-TFP (kindly provided by W.F. Rurup, University of Twente, The Netherlands) as DNA template: 5'-ctccacggatccatcctgtgagcaagggcgag-3' containing a unique BamHI restriction site (underlined) and 5'-ctccacgaattcctgtacagctcgtccatgc-3' containing a unique EcoRI restriction site (underlined). The PCR product was purified and digested with BamHI and EcoRI restriction enzymes (NEB) and ligated into pRSETB plasmid (Invitrogen), digested with the same restriction enzymes, resulting in pRSETB-TFP. Site-directed mutagenesis (QuikChange Lightning Site-Directed Mutagenesis Kit, Agilent) was carried out to yield pRSETB-G<sup>174C</sup>TFP using the same protocol and the following primers: forward 5'-tgctggagggtcggccaccac-3' and reverse 5'-gtgtggcgcgacccctccagca-3'.

The resulting plasmids, pRSETB-TFP and pRSETB-G<sup>174C</sup>TFP, were each transformed into *E. coli* (XL10 gold, Stratagene) using standard procedures in the presence of ampicillin (100 mg/L) for amplification and further mutagenesis. pRSETB-TFP and pRSETB-G<sup>174C</sup>TFP plasmids were also transformed into *E. coli* BL21 pLysS using standard procedures in the presence of ampicillin (100 mg/L) and chloramphenicol (34 mg/L) for protein expression: Single colony transformants were selected and pre-cultures were grown overnight at 37°C. These pre-cultures were each used to inoculate 2 L of LB medium containing ampicillin (100 mg/L) and chloramphenicol (34 mg/L) at 37°C with shaking until an O.D.<sub>600</sub> = 0.6 was reached. The cultures were cooled to 16°C before protein expression was induced with isopropyl-β-D-thiogalactopyranoside (IPTG) to a final concentration of 1 mM and incubated overnight at 16°C. Cells were harvested by centrifugation at 4000xg at 4°C for 20 min. The resulting cell pellets were resuspended for 20 min in BugBuster reagent with benzonase nuclease (Novagen) according to the supplier's

instruction. The lysate was cleared by centrifugation at 16000xg for 30 min at 4°C. Purification of TFP and <sup>6174</sup>C-TFP was carried out using an Äkta FPLC system with a 5 mL ResourceQ anion exchange chromatography column (GE Healthcare) according to the manufacturer's instructions using sterile wash (40 mM PB, pH 8.0) and elution buffers (40 mM PB, 1 M NaCl pH 8.0). The purified TFP and <sup>6174</sup>C-TFP fractions (~30 μM) were subsequently rebuffered using PD10 columns (GE Healthcare) into 0.1xPBS (0.8 mM phosphate buffer (PB), 14.4 mM NaCl, 0.27 mM KCl, pH 7.4), aliquoted, snap-frozen in liquid nitrogen and stored at -80°C. Both expressed variants lack an N-terminal H<sub>6</sub>-tag encoded in pRSETB, due to a frameshift just before the inserted gene. An additional TFP variant was produced following above procedures: **1H<sub>6</sub>TFP**, including the N-terminal H<sub>6</sub>-tag, used as reference. The proteins were characterized using SDS- and native PAGE (Figure S1), UV-Vis, steady state- and time-resolved fluorescence spectroscopy and MALDI-ToF mass spectrometry (see below). Both proteins were characterized using SDS- and native PAGE, steady state and time-resolved fluorescence spectroscopy and mass spectrometry (Table S1).

### **ad<sub>3</sub>TFP and E<sub>3</sub>TFP**

To <sup>6174</sup>C-TFP, possessing a single accessible cysteine, thiol-reactive maleimide-functionalized peptides were conjugated. The heptapeptide -GEREDEK was used to yield reference E<sub>3</sub>TFP, while -GE(ad)RE(ad)DE(ad)K was used to yield ad<sub>3</sub>TFP, where E(ad) is an adamantyl ester of glutamic acid, E, see above. Conjugations were carried out by first reducing the cysteines using 10 mM phosphate buffer (PB), 0.1 mM dithiothreitol (DTT) (pH 8.0) for 30 min and removing the DTT again (Zeba spin, Thermo Scientific) and by then incubating a 10:1 mixture of maleimide:protein (~20 μM) in 10 mM PB (pH 8.0) in the dark for 24 h at RT. The reactions were, subsequently, quenched upon addition of a 10-fold molar excess of DTT with respect to the maleimide for 30 min at RT after which the samples were rebuffered (Zeba spin, Thermo Scientific) into 0.1xPBS at least three times to remove any residual peptide, dye and DTT. TFP, containing no cysteines, was mixed with maleimido-Atto488 dye to serve as negative controls for the conjugation. Characterisation was performed as described above and conjugation yields were typically between 30–50%.

## **3. Methods**

### **Surface plasmon resonance and modeling**

Surface plasmon resonance (SPR) measurements were performed using a Resonant Technologies GmbH (Germany) RT2005 SPR setup in Kretschmann configuration. Glass substrates covered with a 50 nm gold layer were used. On the gold, β-cyclodextrin (βCD) was self-assembled into a monolayer via Au-sulfide interactions (see below) and attached to a 70 μL volume microfluidic cell mounted on a prism which in turn was mounted on a double

goniometer head, with which the angle of incidence of the exciting laser on the prism (Schott, LaSFN9) could be controlled. Light from a 2 mW HeNe laser of 633 nm wavelength passed through the prism and onto the substrate. The intensity of the reflected light from the substrate was measured by a large-area photodiode. The gold-on-glass substrate was optically matched to the prism using index matching oil (Cargille; series B;  $n_D^{25} = 1.700 \pm 0.002$ ). The resonance angle was determined by continuously scanning through the surface plasmon resonance dip and fitting the minimum during binding experiments in a flow-cell. Phosphate buffered saline (PBS) (with 0.01%v/v Tween20 and 0.1 mM adHEG for TFPs) was used as a running buffer at a continuous flow rate of 20  $\mu\text{L}/\text{min}$ .

Experimental data was fitted using a multivalent binding model.<sup>54</sup> The competitive equilibrium for the formation of the surface complex of HEG-Ad was taken into account for the calculation of the theoretical maximum SPR angle shift for each concentration. The effective concentration, which accounts for the immobilization of a second and third adamantane group after the first adamantane was immobilized, was set to 0.1 M.<sup>54</sup> Using a binding constant of  $2.6 \cdot 10^4 \text{ M}^{-1}$  for Ad-HEG<sup>54</sup> a value of  $K_{i, \text{TFP}} = 1.8 \cdot 10^3 \text{ M}^{-1}$  was determined and an overall stability constant for the trivalent surface complex of  $K = 5.4 \cdot 10^7 \text{ M}^{-1}$ . From the analysis of the binding species, we learned that the concentration at which the binding curve reaches a saturation plateau, the surface is covered for 40% with a trivalent species and smaller contributions of the mono and divalent complexes while 40% of the surface is still covered by Ad-HEG, indicating that replacement by a higher stability complex is difficult.

### **NMR spectroscopy and mass spectrometry measurements**

NMR measurements were carried out on either a Varian Unity INOVA 300 MHz or a Bruker Avance 600 MHz UltraShield and mass spectrometry of small molecules and peptides on a Waters micromass LCT spectrometer in ESI mode, while protein masses were determined using an Applied Biosystems Voyager-DE-RP MALDI-ToF mass spectrometer with cinnamic acid as matrix (see Table S1).

### **Preparation of $\beta$ CD monolayers on gold**

SPR sensors (1 inch,  $S_{\text{sense}}$ ) were cleaned using a mixture of  $\text{H}_2\text{SO}_4:\text{H}_2\text{O}_2(30\%)$  3:1 (this mixture reacts violently with organic compounds and should be handled with care) for 30 s, quenched, then rinsed with water, dried in a stream of  $\text{N}_2$  and subsequently immersed in a solution of 5  $\mu\text{M}$   $\beta$ CD-hepta( $\epsilon$ -amino di(dodecyl)thioether) in 2:1 chloroform:EtOH and left to assemble for at least 16 h under Ar at 60°C. Samples were kept for a maximum of 1 week in the reaction mixture under argon atmosphere at 60°C. Samples were only removed from the reaction mixture prior to a measurement, washed with chloroform, EtOH, water, EtOH, 3 times, in this order, dried under a stream of  $\text{N}_2$  and immediately used for measurements.

## Preparation of dual $\beta$ CD/NTA- and $\beta$ CD/PEG- line-patterned glass substrates using NIL

### $\beta$ CD/NTA-line-patterns

4 inch borofloat (Schott, Borofloat 33) wafers were immersed in a mixture of  $\text{H}_2\text{SO}_4$ : $\text{H}_2\text{O}_2$ (30%) 3:1 (this mixture reacts violently with organic compounds and should be handled with care) for 10 min, quenched, then rinsed with water, dried under a stream of  $\text{N}_2$  and subsequently spin-coated (Speedline, p6700) with a 6%w/v 350 kDa poly(methyl methacrylate) (PMMA) solution in toluene for 30 s at 3000 rpm. To remove residual solvent, the wafer was baked at 120°C for 10 min. NIL was carried out using a Peltier temperature controlled (Julabo FP 50) HP Specac NIL setup at 200°C and 1 ton for 10 min. As imprint master a 4 inch 1H,1H,2H,2H-perfluorodecyltrichlorosilane (PFDTs, AB111155, ABCR) coated Si-wafer with 24 1x1 cm large patterns of 10 to 25  $\mu\text{m}$ -wide ridges separated by 5  $\mu\text{m}$ -wide 0.5  $\mu\text{m}$  deep trenches was used. In detail, the patterned imprint master was brought into contact with the spin-coated PMMA layer on a borofloat wafer, cushioned with Kunze heat conducting cushioning foil (KU-TXE100) on one side and 4 layers of aluminium foil on the other side and sealed with aluminium foil. This stack was heated to 200°C, without applying pressure, then the pressure was carefully increased to the equivalent of 1 ton and these conditions were kept constant for 10 min requiring occasional re-adjustment of the pressure. Subsequently, the heating was switched off, while keeping the pressure constant. Upon cooling to 100°C the pressure was left to decrease simultaneously with the temperature. Upon reaching 80°C the stack was removed from the NIL setup, disassembled and residual layer removal was carried out using an SPI supplies, Plasmaprep II oxygen-plasma cleaner. The progress of residual layer removal was monitored for each of the 1x1 cm patterns individually using an Olympus BH2 light microscope in transmission mode with a halogen lamp as light source. Upon completion of removing the residual layer (with only 5  $\mu\text{m}$ -wide ridges of PMMA remaining) the substrates were silanized by overnight chemical vapor deposition of N-[3-(trimethoxysilyl)propyl]ethylenediamine TPEDA *in vacuo*. To remove excess silane, the samples were rinsed thoroughly with ethanol. The resulting amine-terminated line-pattern was functionalized with phenyl diisothiocyanate (DITC). To this end, the samples were immersed in a 0.04 M solution of DITC in ethanol for 2 h at 50°C under argon. After the reaction, the samples were rinsed with ethanol and dried under a stream of  $\text{N}_2$ . The ITC-terminated monolayer was then functionalized with NTA(*t*Bu)<sub>3</sub>-NH<sub>2</sub>. To this end, the samples were incubated in a 1 mM solution of NTA(*t*Bu)<sub>3</sub>-NH<sub>2</sub> in ethanol at 50°C for 2 h under argon. All remaining PMMA was stripped from the borofloat substrates by 30 min sonication in 1 L of acetone, rinsing with acetone and drying with  $\text{N}_2$ . Subsequently, the as yet unfunctionalized (5  $\mu\text{m}$ -wide) lines were silanized by overnight chemical vapor deposition of TPEDA and DITC as described above. Subsequently, the ITC-terminated lines were reacted with  $\beta$ -CD by incubating the samples in a 1 mM solution of  $\beta$ -cyclodextrin-



heptaamine<sup>55</sup> in water at 50°C for 2 h under Ar. Samples were then washed with water and dried under a stream of N<sub>2</sub>. To remove the *t*Bu-protecting groups the samples were immersed in (TFA) overnight, rinsed with copious amounts of water and dried under a stream of N<sub>2</sub>. The resulting bi-functional NTA/CD line-patterns could be stored under N<sub>2</sub> for a maximum of 4 weeks prior to use.

### **βCD/PEG- line-patterns**

In order to fabricate βCD/PEG-line-patterns the same procedure as described above was used for functionalization of the first set of lines. The fabrication of NTA/PEG, line-patterns, has been described previously.<sup>56</sup> βCD/PEG line-patterns were fabricated similarly to the dual line-patterns (see above) by letting β-cyclodextrin-heptaamine react with DITC during the functionalization of the first (wider) set of lines. After the stripping of the remaining PMMA, the second set of lines (5 μm wide) was functionalized with a solution of 100 μL PEG-(trimethoxy)silane (AB111226, ABCR) in 60 mL dry toluene by leaving the samples to react overnight at room temperature under Ar. After washing the samples with toluene they were dried under a flow of N<sub>2</sub>. The resulting mono-functional βCD/PEG-line-patterns could be stored under N<sub>2</sub> for a maximum of 4 weeks prior to use.

### **Protein immobilization on (patterned) substrates**

NTA-layers were incubated with a 1 mM NiCl<sub>2</sub>·6H<sub>2</sub>O solution in water for 30 min after which the samples were rinsed briefly with water. Similarly, βCD-layers were incubated with a 1 mM adamantane hexa(ethylene glycol) (adHEG) solution in PBS. The solution was removed with a pipette from the surface and the sample was rinsed three times with PBS containing 1 mM adHEG. The concentration of adHEG was kept constant in all buffers used in all following incubation steps. For the subsequent immobilization of proteins, samples were incubated with the appropriate protein and/or dye solution generally at a concentration of 1 μM overnight, using humidity chambers, unless stated otherwise. Protein and/or dye solutions were then removed with a pipette and retained for further use. Samples were, then, washed on an orbital shaker (80 rpm) in the appropriate buffers for 2-4 h (first immobilization) or overnight (second immobilization, see text). Samples were then rinsed with the respective wash buffer, subsequently with water and dried under a stream of N<sub>2</sub>. Samples were imaged using an Olympus IX70 inverted fluorescence microscope (see below).

### **Fluorescence Microscopy**

Fluorescence microscopy images were recorded using an Olympus inverted microscope IX71 equipped with a mercury burner U-RFL-T lamp as light source and a digital Olympus DR70 color

camera for image acquisition. Fluorescence micrographs were acquired using a 20x Fluorplan objective from Olympus and exposure times of 1-3 s.

### **Fluorescence Spectroscopy**

Steady state and time-dependent Spectroscopy. Absorption spectra of all fluorescent proteins, their mutants and conjugates were recorded using a Perkin Elmer LAMBDA850 UV/Vis spectrophotometer. Fluorescence spectra and lifetime data of all fluorescent proteins, their mutants and conjugates were recorded using a JobinYvon-Horiba Fluoromax4 fluorimeter including a TCSPC system for time-dependent measurements with pulsed LEDs for excitation at 488 nm or 561 nm. Results are summarized in Table S1.

## 4. Supporting Figures

Chart S1 Structures of E<sub>3</sub>TFP and 3H<sub>6</sub>TagRFP

Table S1 Fluorescence characteristics and mass spectrometry data of protein variants

Figure S1 Specific assembly of protein variants on dual substrates

Figure S2 Influence of adHEG and βCD competitors on the assembly of dual protein patterns

Figure S3 Selfsorting during assembly of dual patterns from a mix of protein and dye

Figure S4 Permutations of assembly of dual protein patterns

Figure S5 Influence of Tween20 and adHEG on the specific assembly of proteins

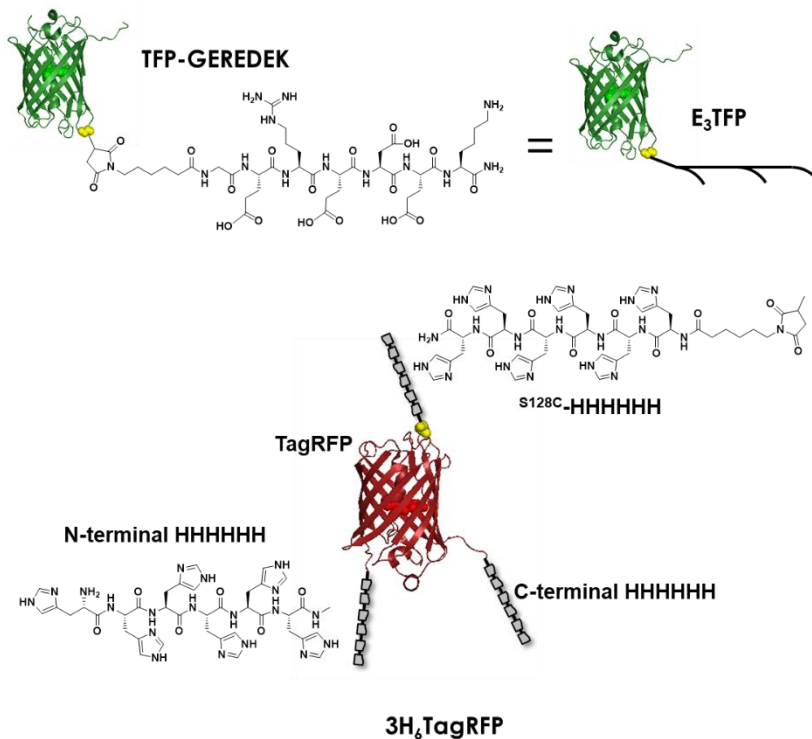

**Chart S1.** Structure of adamantane free, maleimide-functionalized heptapeptide (-GEREDEK) conjugated to the single accessible cysteine residue (yellow) at position G174C of TFP mutant G174C-TFP (E<sub>3</sub>TFP). Structure of mutant S128C-TagRFP modified with an N- and a C-terminal hexahistidine-tag (HHHHHH) and a single accessible cysteine residue (yellow) at position S128C, to which a maleimide-functionalized hexahistidine-tag (-HHHHHH) was conjugated (3H<sub>6</sub>TagRFP).

**Table S1:** steady-state (absorption and emission maxima in nm) and time-resolved (fitted single exponential lifetimes in ns) fluorescence and MALDI-ToF MS (calculated mass in g/mol and measured data in m/z) data of protein variants.

| Protein variant        | Absorption max (nm) | Emission max (nm) | Fluorescence lifetime (ns) | Mass calc. (g/mol) | MALDI TOF MS Mass meas. (m/z) |
|------------------------|---------------------|-------------------|----------------------------|--------------------|-------------------------------|
| 1H <sub>6</sub> TagRFP | 555                 | 579               | 2.4                        | 30277              | 30000                         |
| 3H <sub>6</sub> TagRFP | N/A                 | N/A               | N/A                        | 32164              | 31700                         |
| 1H <sub>6</sub> TFP    | 466                 | 494               | 3.3                        | 30677              | 30916                         |
| G174CTFP               | 466                 | 494               | 3.3                        | 26953              | 26700                         |
| E <sub>3</sub> TFP     | N/A                 | N/A               | N/A                        | 28007              | 27200                         |
| Ad <sub>3</sub> -TFP   | N/A                 | N/A               | N/A                        | 28788              | 28300                         |

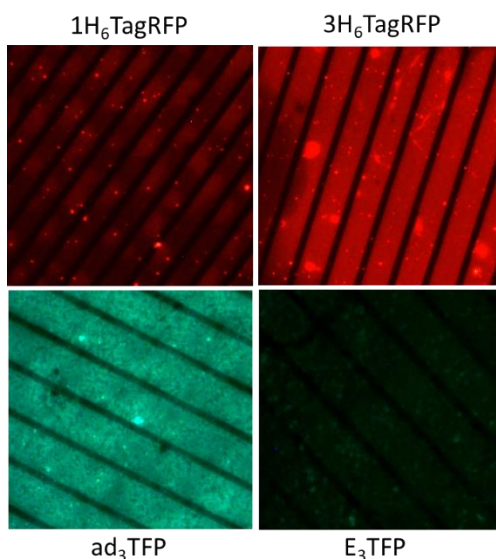

**Fig. S1** Representative fluorescence images of NIL-patterned dual substrates with fluorescent proteins assembled following optimized procedures. Top row: narrower, 5  $\mu\text{m}$  wide lines are PEG-silane; wider lines are Ni(II)NTA, after incubation with 100 nM 1H<sub>6</sub>TagRFP (top, left) and 100 nM 3H<sub>6</sub>TagRFP (top, right) and subsequent washing overnight with PBS containing 5%v/v Tween20. Bottom row: narrower, 5  $\mu\text{m}$  wide lines are PEG-silane; wider lines are  $\beta\text{CD}$ , after incubation with 5  $\mu\text{M}$  ad<sub>3</sub>TFP (bottom, left) and 5  $\mu\text{M}$  reference compound E<sub>3</sub>TFP (bottom, right) and subsequent washing overnight with PBS containing 0.1 mM adHEG and 10 mM  $\beta\text{CD}$ . All images were recorded at 2 s exposure time and are shown with comparable intensities for each row.

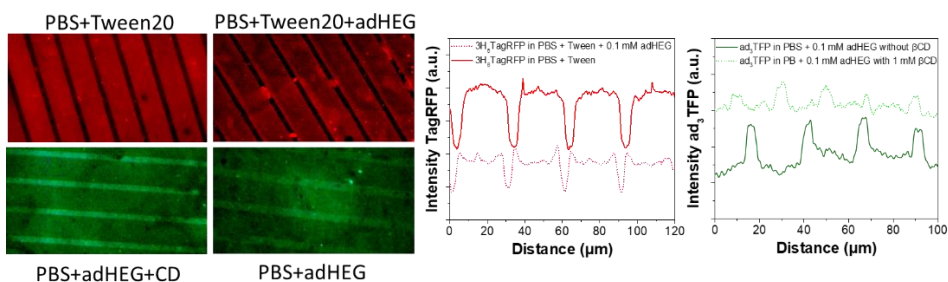

**Fig. S2** Representative fluorescence images (far left and left columns) of NIL-patterned bifunctional  $\beta$ CD-Ni(II)NTA substrates (narrower, 5  $\mu$ m wide lines are  $\beta$ CD; wider lines are Ni(II)NTA) after incubation with 1  $\mu$ M  $3H_6$ TagRFP (top row, red channel), then, with 500 nM  $ad_3$ TFP (bottom row, green channel) and subsequent washing overnight with PBS containing 5%v/v Tween20 (top row) without (top, left) or with (top, right and bottom row) 0.1 mM adHEG, or containing additional 1 mM  $\beta$ CD (bottom left). Top and bottom row images were recorded at 500 ms and 3 s exposure time, respectively, and are shown with comparable intensities for each row. Plots of fluorescence intensity profiles (offset) of top row fluorescence images in left and far left column (right) as well as of fluorescence intensity profiles (offset) of bottom row fluorescence images in left and far left column (far right).

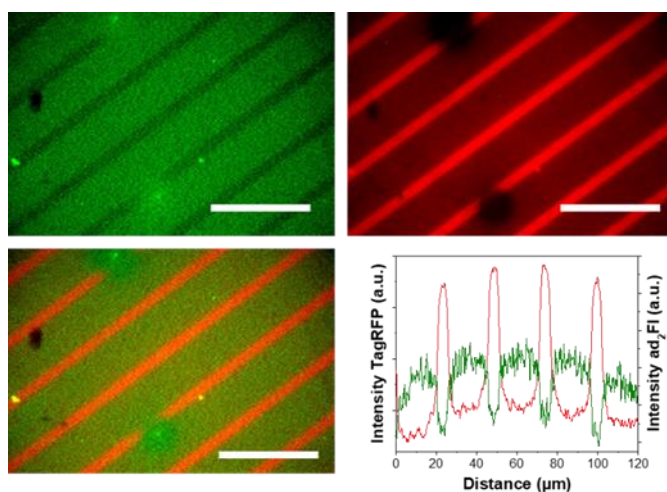

**Fig. S3** Representative fluorescence image overlays of green and red channel images of photolithography-patterned bifunctional  $\beta$ CD-Ni(II)NTA substrates (narrower, 5  $\mu$ m wide lines are Ni(II)NTA; wider lines are  $\beta$ CD) after incubation with a mixture of 2  $\mu$ M  $ad_2$ FI and 1  $\mu$ M  $1H_6$ mRFP (the plasmid pRSETB-mRFP was a generous gift from Kirsten Leijenhorst-Groener) and subsequent rinsing. All solutions were in PBS containing 5%v/v Tween20. White scale bars are 50  $\mu$ m.

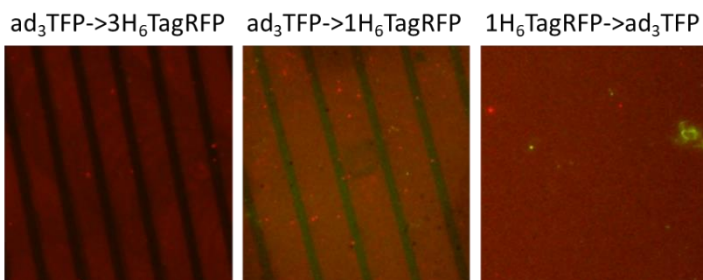

**Fig. S4** Representative fluorescence image overlays of green and red channel of NIL-patterned bifunctional  $\beta$ CD-Ni(II)NTA substrates (narrower, 5  $\mu$ m wide lines are  $\beta$ CD; wider lines are Ni(II)NTA) after incubation with, left: first 500 nM  $ad_3TFP$ , then with 100 nM  $3H_6TagRFP$ ; middle: first with 500 nM  $ad_3TFP$ , then with 100 nM  $1H_6TagRFP$ ; or right: first with 100 nM  $1H_6TagRFP$ , then with 100 nM  $ad_3TFP$ . PBS was used as wash buffer for  $ad_3TFP$  containing 0.1 mM adHEG and 1 mM  $\beta$ CD; PBS containing 5%v/v Tween20 and 0.1 mM adHEG was used for TagRFP variants.

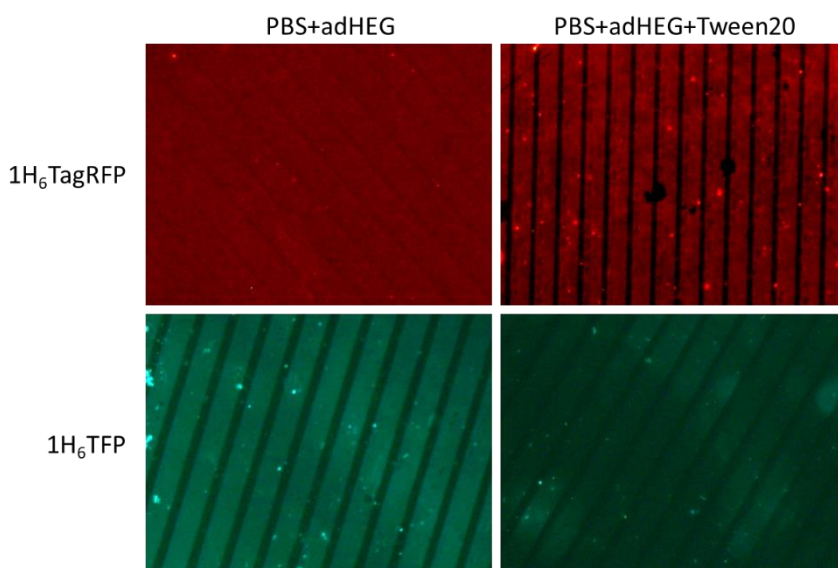

**Fig. S5** Representative fluorescence images of NIL-patterned bifunctional  $\beta$ CD-Ni(II)NTA substrates (narrower, 5  $\mu$ m wide lines are  $\beta$ CD; wider lines are Ni(II)NTA) after incubation with 5  $\mu$ M  $1H_6TagRFP$  (top row, red channel), or 5  $\mu$ M  $1H_6TFP$  (bottom row, green channel) and subsequent washing overnight with PBS containing 1 mM adHEG, without (left column) or with 5%v/v Tween20 (right column). Bottom row images were recorded at 1 s and top row images at 2 s (left) 200 ms (right) exposure time, and are shown with comparable intensities for each row.

## 5. Supporting References

- S1 A. Mulder, S. Onclin, M. Peter, J. P. Hoogenboom, H. Beijleveld, J. ter Maat, M. F. Garcia-Parajo, B. J. Ravoo, J. Huskens, N. F. van Hulst and D. N. Reinhoudt, *Small*, 2005, **1**, 242-253.
- S2 S. Lata and J. Piehler, *Nat. Protoc.*, 2006, **1**, 2104-2109.
- S3 R. B. Merrifield, *J. Am. Chem. Soc.*, 1963, **85**, 2149.
- S4 M. L. W. Ludden, A. Mulder, K. Schulze, V. Subramaniam, R. Tampe and J. Huskens, *Chem.-Eur. J.*, 2008, **14**, 2044-2051.
- S5 P. R. Ashton, R. Königer, J. F. Stoddart, D. Alker and V. D. Harding, *J. Org. Chem.*, 1996, **61**, 903.
- S6 D. Wasserberg, J. Cabanas-Danes, J. Prangma, S. O'Mahony, P. A. Cazade, E. Tromp, C. Blum, D. Thompson, J. Huskens, V. Subramaniam and P. Jonkheijm, *ACS Nano*, 2017, **11**, 9068-9083.
